# Supplementary material for: The Effect of Spatial Scale on the Prediction of Tropical Forest Attributes from Image Texture
Source: Hindawi journal article supplement (doi:10.1155/2024/7178211), 2024-04-24
Supplement: f1 [file 7178211.f1.docx]

**Supporting Material**

**Table S1**. Image metrics extracted for each one of the bands used. Subscripts s and t in the image metric abbreviations indicate statistical and texture metrics, respectively. Symbol meanings in the formulas are the following: *i* and *j* stands for pixel tone values, *Pi* stands for the probability values of finding a pixel with value *i* inside the analysis window, while *Pi,j* stands for the probability of finding two contiguous pixels with *i* and *j* values inside the windows (equals each of the GLCM entries). Notice that pixel values in tone metrics range from 0 to 2047 due to its radiometric resolution of 11 bits, while pixel values in texture metrics range from 0 to 63 to the rescaling of the pixel tones to 64 levels of grey.

| Metric | Abbreviation | Image property quantified | Formula |
| --- | --- | --- | --- |
| *Statistical metrics* | | | |
| Mean | means | statistic | Σ*i*(*iPi*) |
| Variance | vars | statistic | Σ*i*[(*i –* means)2*Pi*] |
| Skewness | skewnesss | statistic | vars-3Σ*i*[(*i –* means)3*Pi*] |
| Data range | data.ranges | statistic | *i*max – *i*min |
| Entropy | entropys | energy | -Σ*i*[*Pi*ln(*Pi*)] |
| *Texture metrics* | | | |
| Mean | meant | statistic | Σ*ij*(*iPij*) |
| Variance | vart | statistic | Σ*ij*[(*i –* meant)2*Pij*] |
| Correlation | correlationt | statistic | vars-1Σ*ij*[(*i –* meant)(*j –* meant)*Pij*] |
| Contrast | contrastt | contrast | Σ*ij*[(*i – j*)2*Pij*] |
| Dissimilarity | dissimilarityt | contrast | Σ*ij*[|*i – j*|*Pij*] |
| Homogeneity | homogeneityt | contrast | Σ*ij*{[1+(*i – j*)2]-1*Pij*} |
| Angular second moment | ASMt | energy | Σ*ij*(*Pij*2) |
| Entropy | entropyt | energy | -Σ*ij*[*Pij*ln(*Pij*)] |

**Table S2**. Mean and coefficient of variation (CV) values of the image texture variables according to window size. Image metric abbreviations are described in Table S1.

| Metric | Window size | | | | | | | |
| --- | --- | --- | --- | --- | --- | --- | --- | --- |
| 5 | |  | 9 | |  | 21 | |
| mean | CV |  | mean | CV |  | mean | CV |
| EVI contrastt | 9.07 | 0.43 |  | 8.56 | 0.29 |  | 8.79 | 0.19 |
| EVI correlationt | 0.41 | 0.37 |  | 0.54 | 0.19 |  | 0.62 | 0.11 |
| EVI data.ranges | 0.26 | 0.27 |  | 0.36 | 0.16 |  | 0.51 | 0.13 |
| EVI dissimilarityt | 2.31 | 0.22 |  | 2.23 | 0.16 |  | 2.26 | 0.10 |
| EVI entropys | 3.19 | 0.02 |  | 4.35 | 0.01 |  | 6.05 | 0.01 |
| EVI entropyt | 3.00 | 0.04 |  | 3.87 | 0.04 |  | 4.67 | 0.04 |
| EVI homogeneityt | 0.35 | 0.19 |  | 0.36 | 0.12 |  | 0.36 | 0.08 |
| EVI means | 0.48 | 0.21 |  | 0.47 | 0.21 |  | 0.47 | 0.20 |
| EVI meant | 39.57 | 0.10 |  | 39.44 | 0.09 |  | 39.18 | 0.09 |
| EVI ASMt | 0.05 | 0.16 |  | 0.02 | 0.18 |  | 0.01 | 0.22 |
| EVI skewnesss | 258.73 | 16.72 |  | -140.58 | -7.42 |  | -267.69 | -1.89 |
| EVI variances | 0.01 | 0.59 |  | 0.01 | 0.40 |  | 0.01 | 0.27 |
| EVI variancet | 7.36 | 0.56 |  | 9.54 | 0.39 |  | 12.11 | 0.27 |
| NDVI contrastt | 4.56 | 0.72 |  | 4.33 | 0.59 |  | 4.46 | 0.52 |
| NDVI correlationt | 0.44 | 0.37 |  | 0.55 | 0.19 |  | 0.64 | 0.09 |
| NDVI data.ranges | 0.22 | 0.36 |  | 0.30 | 0.27 |  | 0.41 | 0.20 |
| NDVI dissimilarityt | 1.52 | 0.36 |  | 1.47 | 0.29 |  | 1.49 | 0.25 |
| NDVI entropys | 3.19 | 0.02 |  | 4.35 | 0.01 |  | 6.04 | 0.01 |
| NDVI entropyt | 2.68 | 0.11 |  | 3.35 | 0.11 |  | 3.92 | 0.11 |
| NDVI homogeneityt | 0.48 | 0.21 |  | 0.49 | 0.16 |  | 0.49 | 0.13 |
| NDVI means | 0.69 | 0.09 |  | 0.70 | 0.09 |  | 0.70 | 0.07 |
| NDVI meant | 53.74 | 0.04 |  | 53.77 | 0.04 |  | 53.73 | 0.03 |
| NDVI ASMt | 0.08 | 0.38 |  | 0.05 | 0.46 |  | 0.03 | 0.52 |
| NDVI skewnesss | -4603.69 | -4.22 |  | -5120.75 | -2.18 |  | -3406.44 | -1.40 |
| NDVI variances | 0.00 | 0.76 |  | 0.00 | 0.60 |  | 0.01 | 0.59 |
| NDVI variancet | 3.98 | 0.73 |  | 4.97 | 0.59 |  | 6.39 | 0.59 |
| NIR contrastt | 12.27 | 0.47 |  | 11.90 | 0.38 |  | 12.22 | 0.29 |
| NIR correlationt | 0.41 | 0.35 |  | 0.53 | 0.19 |  | 0.61 | 0.13 |
| NIR data.ranges | 0.16 | 0.27 |  | 0.23 | 0.21 |  | 0.32 | 0.19 |
| NIR dissimilarityt | 2.68 | 0.24 |  | 2.63 | 0.20 |  | 2.66 | 0.15 |
| NIR entropys | 3.14 | 0.03 |  | 4.22 | 0.02 |  | 5.49 | 0.01 |
| NIR entropyt | 3.06 | 0.03 |  | 3.98 | 0.04 |  | 4.89 | 0.04 |
| NIR homogeneityt | 0.31 | 0.20 |  | 0.32 | 0.16 |  | 0.32 | 0.11 |
| NIR means | 0.31 | 0.22 |  | 0.30 | 0.21 |  | 0.30 | 0.21 |
| NIR meant | 20.98 | 0.22 |  | 20.72 | 0.22 |  | 20.36 | 0.21 |
| NIR ASMt | 0.05 | 0.12 |  | 0.02 | 0.19 |  | 0.01 | 0.24 |
| NIR skewnesss | -1035.58 | -9.04 |  | -761.00 | -5.16 |  | -478.17 | -3.82 |
| NIR variances | 0.00 | 0.61 |  | 0.00 | 0.48 |  | 0.00 | 0.34 |
| NIR variancet | 9.91 | 0.59 |  | 12.97 | 0.47 |  | 16.34 | 0.33 |
| R contrastt | 4.41 | 0.42 |  | 4.52 | 0.53 |  | 4.56 | 0.31 |
| R correlationt | 0.44 | 0.38 |  | 0.55 | 0.20 |  | 0.61 | 0.12 |
| R data.ranges | 0.04 | 0.30 |  | 0.05 | 0.30 |  | 0.08 | 0.29 |
| R dissimilarityt | 1.58 | 0.23 |  | 1.57 | 0.24 |  | 1.57 | 0.14 |
| R entropys | 2.83 | 0.05 |  | 3.48 | 0.05 |  | 3.93 | 0.04 |
| R entropyt | 2.81 | 0.07 |  | 3.50 | 0.07 |  | 4.05 | 0.06 |
| R homogeneityt | 0.45 | 0.16 |  | 0.46 | 0.13 |  | 0.46 | 0.08 |
| R means | 0.05 | 0.18 |  | 0.05 | 0.17 |  | 0.05 | 0.14 |
| R meant | 9.24 | 0.19 |  | 9.05 | 0.18 |  | 8.93 | 0.15 |
| R ASMt | 0.07 | 0.25 |  | 0.04 | 0.30 |  | 0.02 | 0.24 |
| R skewnesss | 483499.66 | 1.97 |  | 386721.99 | 1.51 |  | 275250.97 | 0.55 |
| R variances | 0.00 | 0.60 |  | 0.00 | 0.83 |  | 0.00 | 0.58 |
| R variancet | 3.97 | 0.54 |  | 5.31 | 0.83 |  | 6.29 | 0.58 |

**Table S3**. Difference (Δ*q*) between the 5% quantile of the AICc distribution of all models fitted and the AICc value of the best supported model for each forest attribute variable and window size. A Δ*q* > 2 excludes the possibility of a random relationship between image metrics and the forest attribute in the best supported model. Forest attributes: H = mean height (m), HSD = standard deviation of height (m), D = density (ind./ha), AGB = aboveground biomass (Mg/ha), and BA = basal area (m2/ha).

| Forest attribute | Window size | | |
| --- | --- | --- | --- |
| 5 | 9 | 21 |
| H | 30.25 | 24.39 | 337.01 |
| HSD | 54.40 | 22.76 | 319.14 |
| D | 34.08 | 21.16 | 399.34 |
| BA | 33.80 | 9.359 | 8.71 |
| AGB | 38.03 | 12.60 | 395.59 |
